# Supplementary material
Source: publisher site journal article supplement (https://www.dovepress.com/article/477944)
Supplement: Supplementary file 1 [file get_supplementary_file.php]

# Supplemental Files and Legends

**The Supplemental Filesand Legends include:**

- **Table S1**
- **Table S2**
- **Table S3**
- **Table S4**
- **Table S5**
- **Fig.S1**

**Table S1 Laboratory index of patients**

|  | **Total**  **(n=146)** | **PBCT**  **(n=26)** | **No PBCT**  **(n=120)** | ***P*a** |
| --- | --- | --- | --- | --- |
| ALT (U/L) | 165.5 (7.0-906.0) | 161.8 (14.0-465.0) | 165.5 (7.0-906.0) | 0.593 |
| AST (U/L) | 181.5 (13.0-1595.0) | 184.5 (24.0-826.0) | 181.5 (13.0-1595.0) | 0.786 |
| PT (s) | 17.2 (1.2-120.0) | 20.8 (1.2-120.0) | 17.0 (9.8-63.3) | 0.041 |
| APTT (s) | 43.6 (1.7-180.0) | 51.7 (30.0-180.0) | 43.0 (1.7-139.1) | 0.034 |
| Fib (g/L) | 1.4 (0-11.3) | 0.9 (0.3-4.8) | 1.5 (0-11.3) | 0.014 |
| HGB (g/L) | 110.0 (49.3-160.0) | 99.0 (49.3-146.0) | 111.0 (55.0-160.0) | 0.120 |
| PLT (×109 /L) | 157.0 (11.0-463.0) | 161.0 (18.0-370.0) | 156.5 (11.0-463.0) | 0.860 |
| WBC(×109 /L) | 12.5 (1.9-32.7) | 14.6 (6.1-31.4) | 12.2 (1.9-32.7) | 0.454 |
| TBIL (μmol/L) | 77.5 (0-454.0) | 107.2 (0-359.1) | 73.3 (5.2-454.0) | 0.169 |
| Cr(μmol/L) | 122.0 (30.0-488.0) | 120.5 (39.0-273.0) | 122.5 (30.0-488.0) | 0.816 |
| BUN (mmol/L) | 5.8 (0.9-29.5) | 4.7 (1.1-17.4) | 6.0 (0.9-29.5) | 0.184 |
| ALB (g/L) | 27.0(13.0-46.2) | 25.5 (13.0-33.5) | 27.0 (17.0-46.2) | 0.123 |
| AKP (U/L) | 338.0 (48.0-1102.0) | 263.0 (48.0-668.0) | 338.0 (73.0-1102.0) | 0.309 |

**Note：**

Bold font represents significant data.

Values are medians (ranges).

aThe values are calculated by the nonparametric rank-sum test.

**Abbreviations:**

PBCT: prenatal blood component transfusion; ALT: alanine aminotransferase; AST: aspartate aminotransferase; PT: prothrombin time; APTT: activated partial thromboplastin time; Fib: fibrinogen; HGB: hemoglobin; PLT: platelet; WBC: white blood cell; TBIL: total bilirubin in serum; Cr: creatinine; BUN: blood urea nitrogen; ALB: albumin; AKP: alkaline phosphatase.

**Table S2 Maternal and fetal outcomes**

|  | **No. of patients (n, %)** | **No. of events (n, %)** | **Type of events** |
| --- | --- | --- | --- |
| **Maternal outcomes** |  |  |  |
| **Total** | 146 | 41 |  |
| Only plasma transfusion | 9 (6.2) | 4 (9.8) | 2 DIC+ MD;1 PPH +MD; 1 DIC |
| Only cryoprecipitate transfusion | 2 (1.4) | 1 (2.4) | 1 DIC |
| Plasma and cryoprecipitate transfusion | 15 (10.3) | 6 (14.6) | 2 PPH; 2 PPH+ DIC; 2 PPH+ DIC+ MD |
| No blood component transfusion | 120 (82.2) | 30 (73.2) | 10 PPH;7 PPH+ DIC;10 DIC;1 PPH+ DIC+ MD;1PPH+ MD;1MD |
| **Fetal outcomes** |  |  |  |
| **Total** | 172 | 91 |  |
| Only plasma transfusion | 10 (5.8) | 6 (6.6) | 1LBW+ LAS+ IUFD+ ND;1LBW+ LAS+ IUFD;2LBW+ IUFD;1LBW; 1LAS+ IUFD+ ND |
| Only cryoprecipitate transfusion | 2 (1.2) | 1 (1.1) | 1LBW+ LAS+ IFD |
| Plasma and cryoprecipitate transfusion | 17 (9.9) | 10 (11.0) | 4LBW;2LAS+ IFD; 1LAS+ ND; 1LBW+ LAS+ ND; 1LBW+ LAS+ IUFD;1LBW + IUFD +ND |
| No blood component transfusion | 143 (83.1) | 74 (81.3) | 32LBW; 1LAS+ IFD;11LBW + IUFD;1LBW+ LAS+ ND; 1LBW+ LAS+ IFD;10IUFD; 3LBW + IUFD+ FGR; 3IFD; 4LBW+ LAS+ IUFD;2 LAS; 2LAS+ IUFD; 1LBW+ LAS; 2LBW+ LAS+ ND+ IUFD; 1LAS+ IUFD+ ND |

**Note:**

Bold font represents significant data.

**Abbreviations：**

DIC: disseminated intravascular coagulation; MD: maternal death; PPH: postpartumhemorrhage; LBW: low birth weight; LAS: low Apgar score; IUFD: intrauterine fetal distress; ND: neonatal death; FGR: fetal growth restriction; IFD: intrauterine fetal death.

**Table S3 Univariate LR analysis: predictors of adverse maternal outcomes**

|  | **Total**  **(n=146)** | **Adverse maternal outcome** | |
| --- | --- | --- | --- |
|  | **Odds ratio (95% CI)** | ***P*a** |
| **Baseline characteristic** |  |  |  |
| Caesareandelivery (vs. vaginal delivery) | 128 (87.7) | 0.15 (0.05-0.42) | <0.001 |
| Caesareandelivery history (vs. no) | 32 (21.9) | 0.30 (0.10-0.91) | 0.034 |
| **Number of babies** |  |  | 0.351 |
| 1 | 124 (84.9) | Reference |  |
| ≥2 | 22 (15.1) | 1.58 (0.61-4.10) |  |
| **Clinical manifestation** |  |  |  |
| Nausea | 61 (41.8) | 0.98 (0.47-2.04) | 0.961 |
| Vomiting | 59 (40.4) | 0.92 (0.44-1.93) | 0.831 |
| Jaundice | 46 (31.5) | 4.56 (2.11-9.85) | <0.001 |
| Vaginal bleeding/discharge | 45 (30.8) | 4.82 (2.22-10.47) | <0.001 |
| Abdominal pain | 41 (28.1) | 1.08 (0.49-2.41) | 0.842 |
| Dizzy | 18 (12.3) | 0.47 (0.13-1.73) | 0.259 |
| Acid reflux | 11 (7.5) | 0.55 (0.11-2.65) | 0.453 |
| **Gestational diabetes mellitus** |  |  | 0.999 |
| No | 136 (93.2) | Reference |  |
| Yes | 10 (6.8) | 0.00 (0.00-blank) |  |
| **Gestational hypertension** |  |  | 0.268 |
| No | 124 (84.9) | Reference |  |
| Yes | 22 (15.1) | 0.52 (0.17-1.65) |  |
| **Laboratory examination** |  |  |  |
| AST ≥234.5 (U/L) | 54 (37.0) | 0.25 (0.10-0.63) | 0.003 |
| ALT ≥150.5 (U/L) | 69 (47.3) | 0.18 (0.08-0.41) | <0.001 |
| WBC ≥13.11 (×109 /L) | 67 (45.9) | 3.65 (1.69-7.85) | 0.001 |
| TBIL ≥93.7 (μmol/L) | 61 (41.8) | 3.47 (1.63-7.37) | 0.001 |
| HGB ≤97.5 (g/L) | 51 (34.9) | 5.55 (2.55-12.08) | <0.001 |
| PLT ≤100 (×109 /L) | 45 (30.8) | 7.85 (3.50-17.58) | <0.001 |
| Fib ≤1.165 (g/L) | 56 (38.4) | 14.71 (5.98-36.18) | <0.001 |
| PT ≥19.45 (s) | 52 (35.6) | 12.40 (5.26-29.25) | <0.001 |
| APTT ≥45.25 (s) | 69 (47.3) | 15.71 (5.65-43.66) | <0.001 |
| Cr ≥130.5 (μmol/L) | 66 (45.2) | 3.26 (1.53-6.96) | 0.002 |
| BUN ≥5.42 (mmol/L) | 79 (54.1) | 3.68 (1.64-8.27) | 0.002 |
| ALB ≤25.95 (g/L) | 63 (43.2) | 7.07 (3.10-16.14) | <0.001 |
| AKP ≥247 (U/L) | 50 (34.2) | 2.38 (1.13-5.01) | 0.022 |
| **Blood components transfusion** |  |  |  |
| Plasma transfusion before delivery ≤100 (ml) | 122 (83.6) | 0.48 (0.19-1.18) | 0.110 |
| Cryoprecipitate transfusion before delivery ≤3 (U) | 129 (88.4) | 0.51 (0.18-1.45) | 0.207 |
| Plasma transfusion at delivery ≤540 (ml) | 121 (82.9) | 0.34 (0.14-0.83) | 0.018 |
| Cryoprecipitate transfusion at delivery ≤26 (U) | 99 (67.8) | 0.66 (0.31-1.39) | 0.271 |

**Note:**

Bold font represents significant data.

aThe values are calculate by the univariate logistic regression analysis.

**Abbreviations：**

LR: logistic regression; CI: confidence interval; AST: aspartate aminotransferase; ALT: alanine aminotransferase; WBC: white blood cell; TBIL: total bilirubin in serum; HGB: hemoglobin; PLT: platelet; Fib: fibrinogen; PT: prothrombin time; APTT: activated partial thromboplastin time; Cr: creatinine; BUN: blood urea nitrogen; ALB: albumin; AKP: alkaline phosphatase.

Table S4 UnivariateLR analysis: predictors of adverse fetal outcomes

|  | **Total**  **(n=172)** | **Adverse fetal outcome** | |
| --- | --- | --- | --- |
|  | **Odds ratio (95% CI)** | ***P*a** |
| **Baseline characteristic** |  |  |  |
| Age at delivery ≥27.5 (years) | 78 (45.3) | 1.90 (1.03-3.49) | 0.040 |
| Caesarean delivery (vs. vaginal delivery) | 148 (86.0) | 1.69(0.71-4.06) | 0.238 |
| Caesarean delivery history (vs. no) | 42 (24.4) | 1.10(0.55-2.22) | 0.782 |
| Gestational age ≤36.1 (weeks) | 83 (48.3) | 7.74 (3.91-15.31) | <0.001 |
| **Clinical manifestation** |  |  |  |
| Nausea | 74 (43.0) | 1.59 (0.87-2.93) | 0.136 |
| Vomiting | 72 (41.9) | 1.61 (0.87-2.97) | 0.130 |
| Jaundice | 51 (29.7) | 4.31 (2.06-9.04) | <0.001 |
| Vaginal bleeding/discharge | 51 (29.7) | 1.41 (0.73-2.72) | 0.314 |
| Abdominal pain | 53 (30.8) | 0.89 (0.47-1.71) | 0.731 |
| Dizzy | 20 (11.6) | 1.10 (0.43-2.81) | 0.842 |
| Acid reflux | 12 (7.0) | 0.88 (0.27-2.85) | 0.834 |
| **Gestational diabetes mellitus** |  |  | 0.465 |
| No | 161 (93.6) | Reference |  |
| Yes | 11 (6.4) | 1.60 (0.45-5.69) |  |
| **Gestational hypertension** |  |  | 0.595 |
| No | 147 (85.5) | Reference |  |
| Yes | 25 (14.5) | 0.80 (0.34-1.86) |  |
| **Laboratory examination** |  |  |  |
| AST ≥91 (U/L) | 127 (73.8) | 3.92 (1.88-8.19) | <0.001 |
| ALT ≥122.5 (U/L) | 109 (63.4) | 2.88 (1.52-5.49) | 0.001 |
| WBC ≥12.955 (×109 /L) | 80 (46.5) | 1.88 (1.02-3.46) | 0.042 |
| TBIL ≥111.5 (μmol/L) | 59 (34.3) | 3.23 (1.64-6.34) | 0.001 |
| PLT ≤100 (×109 /L) | 54 (31.4) | 1.63 (0.84-3.13) | 0.146 |
| Fib ≤0.835 (g/L) | 47 (27.3) | 4.17 (1.94-8.92) | <0.001 |
| PT ≥19.10 (s) | 68 (39.5) | 4.80 (2.44-9.44) | <0.001 |
| APTT ≥46.05 (s) | 79 (45.9) | 3.63 (1.92-6.85) | <0.001 |
| Cr ≥115.5 (μmol/L) | 95 (55.2) | 3.82 (2.03-7.21) | <0.001 |
| BUN ≥6.65 (mmol/L) | 69 (40.1) | 3.19 (1.67-6.08) | <0.001 |
| ALB ≤27.55 (g/L) | 98 (57.0) | 2.67 (1.44-4.98) | 0.002 |
| AKP ≥500 (U/L) | 39 (22.7) | 2.43(1.13-5.19) | 0.022 |
| **Blood components transfusion** |  |  |  |
| Plasma transfusion at delivery ≤100 (ml) | 76 (44.2) | 0.34(0.18-0.63) | 0.001 |
| Cryoprecipitate transfusion at delivery ≤2 (U) | 83 (48.3) | 0.39(0.21-0.72) | 0.003 |

**Note:**

Bold font represents significant data.

aThe values are calculated by the univariate logistic regression analysis.

**Abbreviations：**

LR: logistic regression; CI: confidence interval; AST: aspartate aminotransferase; ALT: alanine aminotransferase; WBC: white blood cell; TBIL: total bilirubin in serum; PLT: platelet; Fib: fibrinogen; PT: prothrombin time; APTT: activated partial thromboplastin time; Cr: creatinine; BUN: blood urea nitrogen; ALB: albumin; AKP: alkaline phosphatase.

| **Classifier** | **TP** | **FN** | **FP** | **TN** | **Accuracy** | **Sensitivity** | **Specificity** | **Precision** | **NPV** | **AUC** |
| --- | --- | --- | --- | --- | --- | --- | --- | --- | --- | --- |
| **Maternal high-risk factors** | | | | | | | | | | |
| SVM | 97 | 8 | 15 | 26 | 0.84 | 0.92 | 0.63 | 0.87 | 0.76 | 0.90 |
| KNN | 99 | 6 | 16 | 25 | 0.85 | 0.94 | 0.61 | 0.86 | 0.81 | 0.89 |
| NB | 93 | 12 | 7 | 34 | 0.87 | 0.89 | 0.83 | 0.93 | 0.74 | 0.92 |
| DT | 99 | 6 | 12 | 29 | 0.88 | 0.94 | 0.71 | 0.89 | 0.83 | 0.88 |
| RF | 94 | 11 | 11 | 30 | 0.85 | 0.90 | 0.73 | 0.90 | 0.73 | 0.89 |
| **Fetal high-risk factors** | | | | | | | | | | |
| SVM | 58 | 23 | 19 | 72 | 0.76 | 0.72 | 0.79 | 0.75 | 0.76 | 0.81 |
| KNN | 64 | 17 | 21 | 70 | 0.78 | 0.79 | 0.77 | 0.75 | 0.80 | 0.86 |
| NB | 59 | 22 | 21 | 70 | 0.75 | 0.73 | 0.77 | 0.74 | 0.76 | 0.85 |
| DT | 63 | 18 | 21 | 70 | 0.77 | 0.78 | 0.77 | 0.75 | 0.80 | 0.81 |
| RF | 58 | 23 | 19 | 72 | 0.76 | 0.72 | 0.79 | 0.75 | 0.76 | 0.86 |

**Table S5Prediction of the maternal and fetal high-risk factors by ML analysis**

**Note:**

Bold font represents significant data.

**Abbreviations：**

TP: true positive; FN: false negative; FP: false positive; TN: true negative; NPV: negative predictive value; AUC: area under the receiver operating characteristic curve; SVM: support vector machine; KNN: k-nearest neighbour; NB: naïve Bayes; DT: decision tree; and RF: random forest.

**Fig.S1 ROC curves of the ML analysis for maternal (A) and fetal (B) high-risk factor**

**
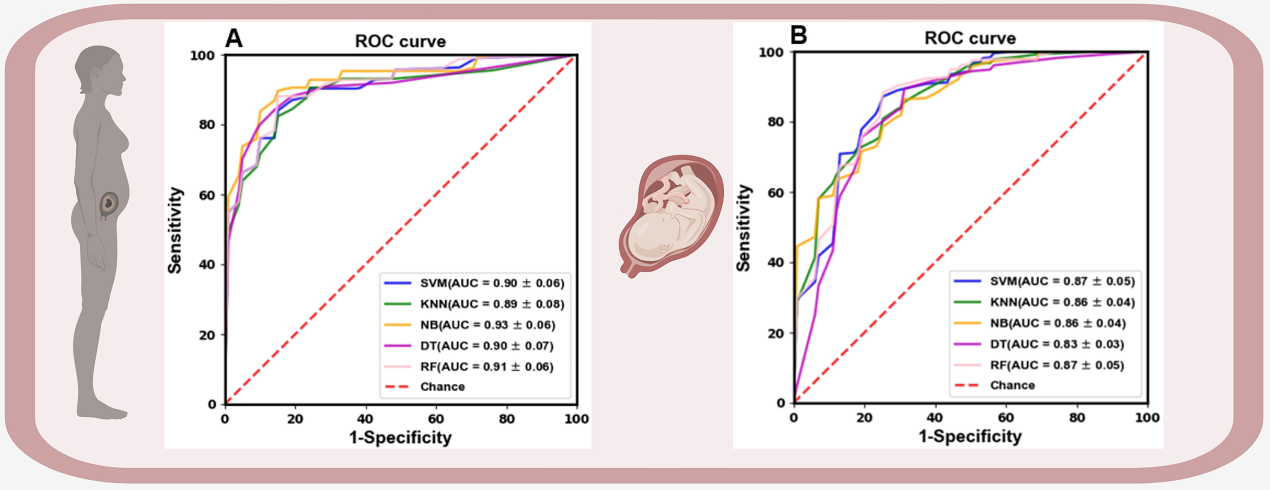
**

**Note:**

(A) shows ROC curves of the ML analysis for maternal high-risk factors, (B) shows ROC curves of the ML analysis for fetal high-risk factors.

**Abbreviations：**

ROC: receiver operating characteristic; ML: machine learning; SVM: Support vector machine;KNN: K-nearest neighbor; NB: Naïve Bayes; DT: Decision tree; RF: Random forest; and AUC: area under the receiver operating characteristic curve.
